**Title:**

Systematic evaluation of chromatin immunoprecipitation sequencing to study histone occupancy in dormancy transitions of grapevine buds

**Running title:**

**Evaluation of CHIP-seq to study histone occupancy in grapevine bud dormancy**

**Authors:**

Dina Hermawaty<sup>1</sup>, Jonathan Cahn<sup>2</sup>, Tinashe G. Chabikwa<sup>2</sup>, Ryan Lister<sup>2</sup>, Michael J. Considine<sup>1,2,3</sup>

**Affiliations:**

1 The UWA Institute of Agriculture, and School of Agriculture and Environment, The University of Western Australia, Perth, WA 6009, Australia

2 ARC Centre of Excellence in Plant Energy Biology, School of Molecular Sciences, University of Western Australia, Perth, WA, Australia

3 Department of Primary Industries and Regional Development, South Perth, WA 6151, Australia

**Correspondence:**

michael.considine@uwa.edu.au (tel. +618 6488 1783)

**Other authors emails:**

DH, dina.hermawaty@gmail.com

JC, cahnjonathan@gmail.com

TC, now deceased 27<sup>th</sup> Feb 2022

**Keywords**

Dormancy, Chromatin, Histone occupancy, Epigenetic, DNA sequencing, Woody tissues, Perennial plant, DNA-protein interactions

## 1           **1. Abstract**

2   The regulation of DNA accessibility by histone modification has emerged as a paradigm of  
3   developmental and environmental programming. Chromatin immunoprecipitation followed by  
4   sequencing (ChIP-seq) is a versatile tool widely used to investigate *in vivo* protein-DNA interaction.  
5   The technique has been successfully demonstrated in several plant species and tissues; however, it  
6   has remained challenging in woody tissues. Here we developed a ChIP method specifically for  
7   mature dormant grapevine buds (*Vitis vinifera* cv. Cabernet Sauvignon). Each step of the protocol  
8   was systematically optimised, including crosslinking, chromatin extraction, sonication, and antibody  
9   validation. Analysis of histone H3-enriched DNA was performed to evaluate the success of the  
10   protocol and identify occupancy of histone H3 along grapevine bud chromatin. To our best  
11   knowledge, this is the first ChIP experiment protocol optimised for grapevine bud system.

12

## 13           **2. Introduction**

14   Chromatin immunoprecipitation (ChIP) enables the study of DNA-protein interactions and has  
15   become a method of choice for studying trans-regulation of gene expression, as well as post-  
16   translation histone modification. The technique was developed following a report demonstrated  
17   reversible crosslinking of nucleosome-DNA by formaldehyde (Jackson, 1978; Klockenbusch et al.,  
18   2012). In combination with several DNA assay techniques, such as southern blotting (Solomon et al.,  
19   1988 and Orlando et al., 1997), polymerase chain reaction (Hecht et al., 1996), microarray (Iyer et  
20   al., 2001), and sequencing (Johnson et al., 2007), the DNA sequence associated with the protein of  
21   interest may be identified. Forty years after its development, ChIP has been extensively used to  
22   study epigenetic regulation in animal and yeast cells, but only recently applied in plants (Johnson et  
23   al., 2001 and Wang et al., 2002). The delay in uptake of ChIP in plant science was due to several  
24   impediments, particularly: (1) a large amount of tissue is typically needed, (2) the presence of cell  
25   walls required vigorous physical disruption therefore sample loss during the process is unavoidable  
26   and resulted in low DNA yield, (3) co-extraction and precipitation of interfering compounds often  
27   problematic for downstream analysis such as PCR/ qPCR and library preparation, (4) limited  
28   availability of ChIP-grade antibodies specific for plant cells often leading to a false-negative signal,  
29   and (5) the comprehensive ENCODE guidelines for model biological system is not always applicable  
30   for plant biology research.

31   The intriguing and complex regulation of plant developmental processes, as a response to  
32   environmental stimuli, has driven many studies on gene expression regulation in an epigenetic  
33   context. The vernalisation requirement for flowering of *Arabidopsis* is established by the flowering  
34   repressor FLOWERING LOCUS C (FLC), whereby chilling-dependent histone modification of the FLC

35 locus represses transcription and hence enables flowering (Michael and Amasino, 1999; Halliwell et  
36 al., 2006). As histones are widely conserved and several commercial antibodies available, ChIP has  
37 been successfully applied to non-model plant studies also, including dormancy in perennial buds  
38 (Leida et al., 2012; Saito et al., 2015; and de la Fuente et al., 2015). To date, protocols guiding ChIP  
39 experiments in plant systems, such as Arabidopsis (Saleh et al., 2008), tomato (Ricardi et al., 2010),  
40 maize (Haring et al., 2007) followed by DNA microarray hybridization (Reimer and Turck, 2010) or  
41 sequencing (Kaufmann et al., 2010) have been published. However, the variables amongst these  
42 studies illustrate the need to tailor conditions to each experiment, and in particular each tissue type  
43 (Park, 2009; Landt et al., 2012). As such, protocols established for soft tissues such as leaves (Saleh  
44 et al., 2008) or seedlings (Ricardi et al., 2010) are likely to be ineffective for seed (Haque et al., 2018)  
45 or wood forming tissues (Li et al., 2014a). Further, metastudies have shown that even commercially  
46 available ChIP-grade antibodies may fail control tests for specificity (Egelhofer et al., 2011). In some  
47 cases, batch information of these validation steps is available either on the ENCODE Project website  
48 (Davis et al., 2017) or subsites (Egelhofer et al., 2011) or via the manufacturer. Alternatively, the  
49 antibody/s must be validated before commencing ChIP experiment (Landt et al., 2012). Procedures  
50 and criteria for antibody validation have been well-outlined by members of the ENCODE Project,  
51 however these were specifically developed for animal tissues, and hence neglect for example the  
52 additional constraints of working with plant cell walls and particularly lignified tissues.

53 The ChIP workflow is summarised in **Figure 1**. In brief, the interaction of protein and DNA  
54 (collectively known as chromatin) is crosslinked *in vivo* by incubation of tissue in formaldehyde  
55 solution. The crosslinked chromatin is then fragmented by sonication which breaks the chromatin  
56 into short fragments that are suitable for the subsequent processes. The protein-DNA complex is co-  
57 precipitated using antibody allowing selective precipitation of DNA that interacts with protein of  
58 interest. The precipitated DNA is released from the protein by reverse crosslinking and subsequently  
59 assayed to identify the sequence. Each step in the ChIP procedure is prone to high variability; for  
60 example, sonication must be titrated to ensure the optimal size of chromatin while preventing  
61 damage. Similarly, for crosslinking, insufficient crosslinking could cause poor preservation of  
62 chromatin and its associated protein and significantly reduce the yield of DNA at the end of the  
63 immunoprecipitation process (Orlando, 2000). Alternatively, excessive crosslinking can make the  
64 chromatin brittle and prevent efficient reversibility of the crosslinking at subsequent steps.  
65 Therefore, optimisation needs to be systematic in order that the method is robust and reproducible,  
66 yielding maximum enriched-DNA (**Figure 1**, arrow).

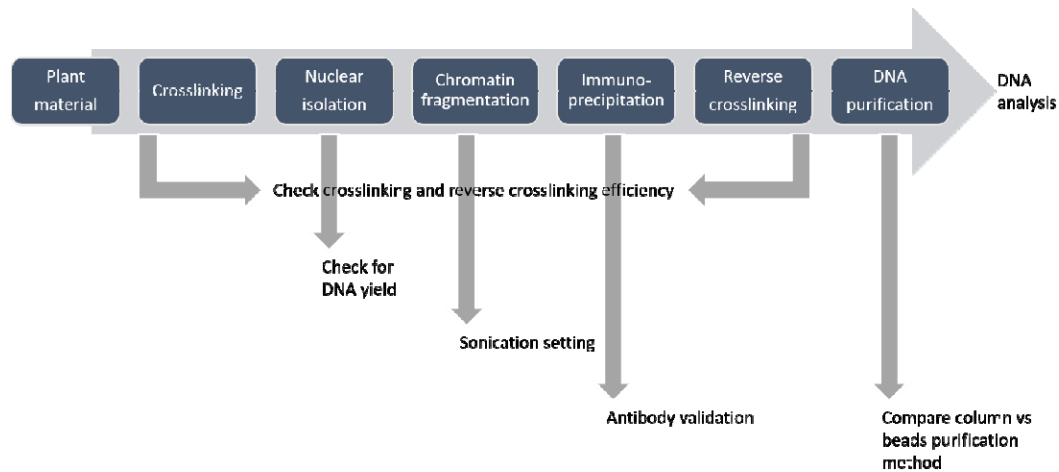

67

68 **Figure 1.** Chromatin immunoprecipitation workflow with checkpoints indicated by the grey arrow.

69 The ChIP protocol we describe is a modified procedure from a protocol optimised for wood-forming  
70 xylem tissue developed by Li et al. (2014) which provides a guide to cope with the difficulties of  
71 working with woody tissue. Systematic optimisation was performed according to ENCODE guidelines  
72 for ChIP experiment (Landt et al., 2012.) and other recommendations from previously published ChIP  
73 protocols with plant tissue (Ricardi et al., 2010; Haring et al., 2007; Song et al., 2016). Chromatin  
74 immunoprecipitation was performed using a ChIP kit manufactured by Abcam to eliminate washing  
75 steps after immunoprecipitation which often contribute to loss of enriched-DNA. Finally, we  
76 performed, DNA sequencing and identified gene that was occupied by histone H3 protein.

### 77 **3. Materials and Equipment**

#### 78 **Plant material and treatment**

79 The mature dormant buds of *Vitis vinifera* (L.) cv. Cabernet Sauvignon (N+2, Lavee and May, 1997)  
80 were collected from a vineyard in Margaret River, Australia (34 °S, 115 °E) at three time points;  
81 March, May, and August. Each cutting was consisting of 4 mature buds from node 4 to 7. The canes  
82 were immediately transported to the lab in damp newsprint in an insulated box and stored at 22 °C  
83 for up to 24 hours. Treatment with hydrogen cyanamide (H<sub>2</sub>CN<sub>2</sub>; Sigma-Aldrich #187364) was done  
84 by submerging the node into 1.25 % (w/v) [300 mM] H<sub>2</sub>CN<sub>2</sub> for 30 seconds. Control buds were  
85 treated in the same manner with water (W). The explants were then stored in the dark for 24 hours  
86 at room temperature before being crosslinked.

#### 87 **Reagents**

- 88 • Sucrose (Chem-Supply, Australia, cat. no. SA030-500G)
- 89 • UltraPure 1 M Tris-Cl pH8 (Invitrogen, Australia, cat. no. 15568-025)
- 90 • 0.5 M EDTA pH 8 (Invitrogen, cat. no. AM9260G)

- 91 • Paraformaldehyde (Sigma-Aldrich, Australia, cat. no. P6148-500G)
- 92 • Glycine (Chem-Supply, cat. no. GA007-500G)
- 93 •  $\beta$ -mercaptoethanol (Sigma-Aldrich, cat. no. 63689-100ML-F)
- 94 • Polyvinylpyrrolidone (Sigma-Aldrich, cat. no. PVP40-100G)
- 95 • Triton X-100 (Sigma-Aldrich, cat. no. T9284-100ML)
- 96 • NaCl (Sigma-Aldrich, cat. no. S7653-1KG)
- 97 • Sodium dodecyl sulfate (SDS, Merck, Australia, cat. no. 8.17034.1000)
- 98 • Hydrochloric acid (Sigma-Aldrich, cat. no. 320331-2.5L)
- 99 • Miracloth (Merck-Millipore, Australia, cat. no. 475855)
- 100 • UltraPure phenol:chloroform:isoamyl alcohol 25:24:1 (v/v) (Invitrogen, cat. no. 15593031)
- 101 • Ethidium bromide (Sigma-Aldrich, cat. no. E1510)
- 102 • Absolute ethanol (Merck, cat. no. 1.00983.2511)
- 103 • Agarose (Thermo Scientific, Australia, cat. no. 16500100)
- 104 • 1 kb DNA ladder (Promega, USA, cat. no. G5711)
- 105 • Mini-PROTEAN TGX (Tris-Glycine eXtended), 4-15% precast gradient polyacrylamide gel (Biorad, Australia, cat. no. 161-1104EDU, 10-well, 30  $\mu$ l, 8 x 10 cm (W x L))
- 106 • 10x Tris/Glycine/SDS Buffer (Biorad, cat. no. 161-0732)
- 107 • 4X Laemmli buffer (Biorad, cat. no. 1610747)
- 108 • Protein marker (Blue Star Pre-stained Protein Marker, Nippon Genetics, Japan, cat. no. MWP03)
- 109 • Immun-Blot<sup>®</sup> PVDF membrane, precut, 7 x 8.4 cm (Biorad, cat. no. 1620174)
- 110 • Extra thick blot filter paper, precut, 8 X 13.5 cm (Biorad, cat. no. 1703966)
- 111 • Trans-Blot<sup>®</sup> SD Semi-Dry Electrophoretic Transfer Cell (Biorad, cat. no. 1703940)
- 112 • Primary antibodies: Histone H3 – nuclear loading control rabbit pAb (Abcam, Australia, cat. no. ab1791), Histone H3K4me3 antibody rabbit pAb (Active Motif cat. no. 39915), Histone H3K27me3 antibody rabbit pAb (Active Motif cat. no. 39155)
- 113 • Goat anti-rabbit IgG HRP conjugated secondary antibody (Santa Cruz Biotechnology, cat. no. SCZSC-2030)
- 114 • Pierce<sup>™</sup> ECL Western Blotting Substrate (Thermo Scientific, Australia, cat. no. 32109)
- 115 • CHIP kit plant (Abcam, cat. no. ab117137)
- 116 • NEBNext<sup>®</sup> Ultra<sup>™</sup> II DNA Library Prep Kit for Illumina<sup>®</sup> (New England Biolabs, cat. no. NEB.E7645G).
- 117 • NEBNext<sup>®</sup> Multiplex Oligos for Illumina<sup>®</sup> (New England Biolabs, cat. no. NEB.E7335G).
- 118 • Agentcourt AMPure XP beads (Beckman Coulter Life Science, USA, cat. no. A63881)
- 119 • 4',6-Diamidino-2-Phenylindole dihydrochloride (DAPI, Sigma, cat. no. 102M4012V)

125 **Equipment**

- 126 • Vacuum chamber
- 127 • Vacuum pump
- 128 • Aluminium foil
- 129 • Conical tubes (50 mL and 15 mL)
- 130 • Mortar and pestle
- 131 • Rotator
- 132 • Vortex (Velp Scientifica, Italy)
- 133 • ULTRA-TURRAX homogeniser (model T25 basic, IKA, Germany)
- 134 • Refrigerated centrifuge (model 5810R, Eppendorf)
- 135 • Fix-angle rotor (model F45-30-11 and F34-6-38, Eppendorf)
- 136 • Microcentrifuge tube (1.5 and 2 mL)
- 137 • Focus-ultrasonicator (model S220, Covaris, USA)
- 138 • miliTUBE 1 mL AFA fibre (Covaris, cat. no. 520130)
- 139 • Hot water bath (model B-491, Buchi, Switzerland)
- 140 • NanoDrop (model ND-1000, Thermo Fischer Scientific, Australia)
- 141 • Qubit fluorometer (model Qubit 3.0, Thermo Fischer Scientific, Australia)
- 142 • Bioanalyzer (Agilent 2100 bioanalyzer, Agilent, Australia)
- 143 • Electrophoresis system (Mini Gel II, Select BioProduct, USA)
- 144 • Mini-PROTEAN Electrophoresis system (Biorad)
- 145 • ChemiDoc MP system (Biorad)
- 146 • DynaMag™-2 Magnet (Thermofischer scientific, cat. no. 12321D)
- 147 • Axioscope optical microscope (Zeiss, Oberkochen, Germany) equipped with plan-neofluar
- 148 objectives, UV or blue epi-illumination and differential interference contrast filters.
- 149 • AxioCam digital camera (Zeiss Oberkochen, Germany)

150 **Reagent setup**

- 151 • **Formaldehyde (16%)** Dissolve 4 grams of paraformaldehyde in 21 mL of water and add 1 $\mu$ L
- 152 NaOH (10 M). Stir and heat (no more than 68 °C) until in solution. Let cool to room temperature
- 153 and bring the solution to a final volume of 25 mL.
- 154 • **Sucrose, 2M** Dissolve 68.46 grams of sucrose in 56 mL water. Stir and heat until in solution and
- 155 bring to a final volume of 100 mL. Freshly prepare the solution prior to experiment.

- 156 • **Glycine, 2M** Dissolve 15 grams of glycine in 80 mL of water. Stir until in solution and bring to a  
157 final volume of 100 mL. Store solution at 4 °C and allow solution to reach room temperature (RT)  
158 before use.
- 159 • **10X Protease Inhibitor** Dissolve cOmplete protease inhibitor, EDTA-free in 5 mL water or  
160 dissolve cOmplete protease inhibitor, mini-tablet, EDTA-free in 1 mL water. Vortex until in  
161 suspension. Freshly prepare the suspension prior to experiment. Keep at 4 °C.
- 162 • **Triton X-100, 10% (v/v)** Dissolve 5 mL of Triton X-100 in 40 mL water. Stir slowly until in solution  
163 and bring to a final volume of 50 mL. Store at Store solution at 4 °C.
- 164 • **NaCl, 5 M** Dissolve 29.22 grams of NaCl in 80 mL water. Stir until in solution and bring to a final  
165 volume of 100 mL. Autoclave and store solution at RT.
- 166 • **SDS, 10% (w/v)** Dissolve 10 grams of SDS in 80 mL water. Stir slowly and heat until in solution.  
167 Bring the solution to a final volume of 100 mL. Autoclave and store solution at RT.
- 168 • **Buffer 1** contains 0.4 M sucrose, 10 mM Tris-Cl, 2.5% (w/v) PVP-40, 5 mM β-mercaptoethanol,  
169 1× Roche cOmplete protease inhibitor, EDTA-free. Freshly prepare the buffer prior to  
170 experiment. Pre-chilled before use. Add β-mercaptoethanol and protease inhibitor to the buffer  
171 before use.
- 172 • **Buffer 2** contains 0.25 M sucrose, 10 mM Tris-Cl, 10 mM MgCl<sub>2</sub>, 1% (v/v) Triton X-100, 5 mM β-  
173 mercaptoethanol, 1× Roche cOmplete protease inhibitor, EDTA-free. Freshly prepare the buffer  
174 prior to experiment. Pre-chilled before use. Add β-mercaptoethanol and protease inhibitor to  
175 the buffer before use.
- 176 • **Buffer 3** contains 1.7 M sucrose, 10 mM Tris-Cl, 0.15% (v/v) Triton X-100, 5 mM β-  
177 mercaptoethanol, 1× Roche cOmplete protease inhibitor, EDTA-free. Freshly prepare the buffer  
178 prior to experiment. Pre-chilled before use. Add β-mercaptoethanol and protease inhibitor to  
179 the buffer before use.
- 180 • **Lysis buffer** contains 50 mM Tris-Cl, 10 mM EDTA, 0.1% (v/v) SDS, 1× Roche cOmplete protease  
181 inhibitor, EDTA-free. Freshly prepare the buffer prior to experiment. Pre-chilled before use. Add  
182 protease inhibitor to the buffer before use.
- 183 • **Ethanol, 70% (v/v)** add 30 mL of water into 70 mL of absolute ethanol. Prepare solution prior to  
184 experiment.
- 185 • **Tris-EDTA buffer with low EDTA (TE-lowE)** TE-lowE contains 10 mM of Tris-Cl and 0.1 mM EDTA  
186 pH.8. Store solution at 4 °C.
- 187 • **Transfer buffer** Transfer buffer contains 39 mM glycine, 48 mM tris base, 0.05%(v/v) SDS, 20%  
188 (v/v) methanol. Adjust pH to 8.3 and store at 4 °C.

- 189 • **Tris-buffered saline (TBS) 10X** Dissolve 24.23 grams of Tris base and 80.06 grams of NaCl in 800  
190 mL water. Stir until in solution and adjust pH to 7.6 with HCl. Bring the solution to a final  
191 concentration of 1 L.
- 192 • **Tris-buffered saline with tween (TBST)** TBST contains 1X TBS, 0.5% (v/v) Tween-20. Stir slowly.  
193 Store buffer at 4 °C.
- 194 • **Blocking buffer** Dissolve 5% (w/v) non-fat milk in TBST. Stir until in suspension and keep at RT.  
195 Prepare buffer prior to experiment.
- 196 • **DAPI, 1 mg/mL** Dissolve 1 mg of DAPI dye in 1 mL water. Vortex until in solution. Keep in dark at  
197 4 °C

## 198 **Procedure**

### 199 **Tissue collection**

- 200 1. The buds from node 4 to 7 were excised from the cane and dissected into half, longitudinally, to  
201 increase surface exposed to crosslinking buffer then immediately immersed in a fixative solution.  
202 We used whole buds in this experiment for the convenience of bud harvesting.

### 203 **Crosslinking**

- 204 2. Immediately put the bud into conical tube contains 25 mL **CROSSLINKING BUFFER**, repeat this  
205 until 100 buds are obtained (ca. 2.5 grams). Crosslink the buds for a total of 15 minutes under  
206 cycled vacuum infiltration (5 min/ release/ mix, repeat three times) at room temperature.

207 **NOTE:** Excessive exposure to crosslinking agents may result in inefficient DNA fragmentation  
208 and protein denaturation. Since buds need to be excised from the canes for this experiment,  
209 it took some time to harvest 5-10 grams of buds. We suggest cutting as many buds as  
210 possible in 30 minutes then immediately proceed with vacuum infiltration. In our case, we  
211 handled 100 buds at a time.

- 212 3. Quench the crosslinking reaction by addition of 2 M glycine to a final concentration of 200 mM,  
213 followed by 5 minutes cycled vacuum.

- 214 4. Rinse crosslinked tissue with water twice. Dry tissue between absorbent paper then put them on  
215 the foil.

- 216 5. Snap freeze tissue in liquid nitrogen and store at -80 °C until required.

### 217 **Nuclear isolation**

- 218 6. Unless otherwise indicated, all step must be performed at 4 °C, and the sample must be kept on  
219 ice all the time.

- 220 7. Grind crosslinked buds to a fine powder in liquid nitrogen using mortar and pestle. Always grind  
221 a small amount of tissue at a time, then collect powder into a new 50 mL conical tube. Repeat



222 grinding until all 10 grams of crosslinked buds are ground. The conical tube must be kept on dry-  
223 ice all the time.

224 **NOTE:** one 50 mL canonical tube is suitable for 5 grams of tissue powder. When working  
225 with 10 grams tissue, split the ground powder into two new tubes.

226 8. Mix the powder with seven volumes of **BUFFER 1** in 50 mL conical tube (e.g. 35 mL for every  
227 5 grams tissue). Homogenize using a vortex and an ULTRA-TURRAX homogenizer at 9000 rpm for  
228 15 seconds. Further mix suspension in rotating wheel for 20 minutes at 4 °C.

229 **NOTE:** Complete homogenisation is important to get a maximum DNA yield.

230 **CHECKPOINT:** Comparing DNA yield obtained from vortex homogenization vs ULTRA-  
231 TURRAX may be needed to optimise the homogenisation method.

232 9. Pass the mixture through three layers of Miracloth saturated with Buffer 1 into new 50 mL  
233 conical tube. Squeeze the Miracloth to collect all the liquid.

234 10. Centrifuge suspension at 2,880 *g* for 10 minutes at 4 °C. Discard supernatant.

235 11. Gently resuspend pellet in 2 mL of **BUFFER 2** and transfer suspension into a new 2 mL  
236 microcentrifuge tube.

237 12. Centrifuge suspension at 12,000 *g* for 10 minutes at 4 °C. Discard supernatant.

238 13. Repeat step 10 to 12 once.

239 14. Gently resuspend pellet in 500 µL of **BUFFER 3**. Carefully layer the suspension on top of 1.5 mL  
240 cushion of **BUFFER 3** in a new 2 mL microcentrifuge tube.

241 **NOTE:** Pellet may be difficult to resuspend. A disposable tissue grinder pestle can be used to  
242 carefully loosen the pellet followed by pipetting up and down.

243 15. Centrifuge sample at 16,000 *g* for 60 minutes at 4 °C. Discard supernatant.

244 16. Gently resuspend pellet in 700 µL of **LYSIS BUFFER**. Take 50 µL for the no-sonication control and  
245 keep the resuspended pellet on ice.

246 **CHECKPOINT:** check yield of DNA and validate antibody (**Supplementary Information S1** and  
247 **S2**).

248 **CHECKPOINT:** Nuclei integrity can be checked by adding DAPI dye to a final concentration of  
249 10 mg/mL and examine nuclei using an epifluorescence microscope (**Figure 6**).

## 250 **DNA fragmentation**

251 17. Transfer nuclei suspension into miliTUBE being sure to fill the tubes with lysis buffer (a little  
252 more than 1 mL per tube).

253 18. Sonicate the DNA in Covaris S220 focus-ultrasonicator for 12 minutes following manufacture's  
254 setting for high cell chromatin shearing, i.e. 5 % Duty Cycle, 4 intensity, 140 W peak incident

255 power, 200 cycles per burst, 6 °C bath temperature, frequency sweeping power mode,  
256 continuous degassing mode, and level 8 water. Transfer sonicated DNA into a new 1.5 mL.

257 **CHECKPOINT:** Take 50 µL aliquots after 6, 8, and 10 minutes to compare DNA fragmentation  
258 and each time replace with the same amount of lysis buffer. Keep sample on ice.

259 19. Centrifuge sonicated and non-sonicated DNA at 16,000 *g* for 10 minutes at 4 °C. Transfer clean  
260 supernatant into a new 1.5 mL microcentrifuge tube.

261 20. Proceed immediately to step 21 for chromatin immunoprecipitation. DNA can be stored at –  
262 20 °C and proceed to **Supplementary Information S1** for DNA fragmentation efficiency  
263 examination.

### 264 **Chromatin immunoprecipitation and reverse crosslinking**

265 The following chromatin immunoprecipitation and reverse crosslinking procedure are adapted from  
266 ChIP kit plant from Abcam with some modification.

267 21. Determine the number of strip wells required. Leave these strips in the plate frame (remaining  
268 unused strips can be placed back in the bag. Seal the bag tightly and store at 4 °C).

269 22. Wash strip wells once with **150 µL of WASH BUFFER**.

270 23. Add 100 µL of the **ANTIBODY BUFFER** to each well and then add the antibodies:

- 271 • **3 µg** of an antibody of interest (H3K27me3 and H3K4me3).
- 272 • **2 µg** of anti-histone H3 as a positive control.

273 **NOTE:** ChIP typically requires 1-10 µg per ChIP reaction. Optimising the amount used per  
274 reaction is a further variable to consider, however here the amount chosen followed  
275 manufacturer recommendations.

276 In our experiment with grapevine buds, three reactions (wells) were prepared for each histone H3  
277 modified antibody and two reactions for histone H3 antibody (**Figure 2**).

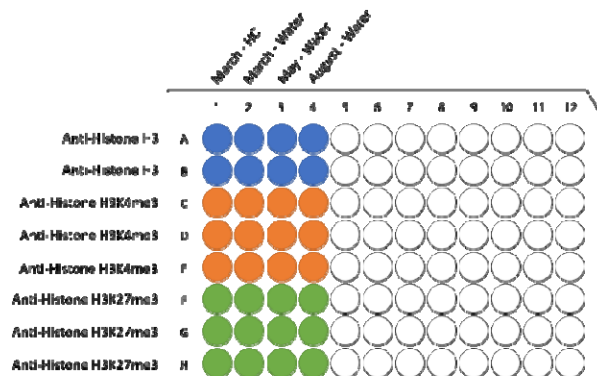

278  
279 **Figure 2.** ChIP assay plate map. Incubation of chromatin and antibodies is done in an assay-well  
280 provide in Abcam’s ChIP kit plant. Each well is designed for one ChIP reaction using 100 µL  
281 fragmented DNA. In our experiment, multiple wells were used per antibodies, i.e. 2-well for anti-

282 histone H3 (blue) and 3-well each for anti-Histone H3K4me3 (orange) and anti-Histone H3K27me3  
283 (green), with each column represent different sample.

284 24. Cover the strip wells with **Parafilm M** and incubate at room temperature for 90 minutes.

285 25. After incubation, remove the incubated antibody solution and wash the strip wells **three times**  
286 with **150 µL** of the **ANTIBODY BUFFER** by pipetting in and out.

287 26. Remove **15 µL** of chromatin aside to a 0.5 mL vial. Label the vial as **“input DNA”** and then place  
288 on ice.

289 **NOTE:** the amount of input DNA is 5 % from the total volume of chromatin used per histone  
290 H3 modifies antibodies, i.e. 5 % from 300 µL.

291 27. Transfer **100 µL** of **chromatin from step 19** to each antibody-bound strip well. Two and three  
292 reactions (wells) are used for Histone H3 and Histone H3-modified immunoprecipitation.

293 **NOTE:** Concentration of SDS in LYSIS BUFFER (step 15) is 0.1 %; therefore, no sample dilution  
294 needed.

295 28. Cover the strip wells with **Parafilm M** and incubate at 4 °C for overnight on an orbital shaker (50-  
296 100 rpm).

297 29. Remove supernatant. Wash the wells six times with **150 µL** of the **WASH BUFFER**. Allow  
298 2 minutes on a rocking platform (100 rpm) for each wash.

299 30. Wash the wells once (for 2 minutes) with **150 µL** of **1X TElowE BUFFER**.

300 31. Add **40 µL** of the **DNA Release mix**, containing 1 µL Proteinase K (10 mg/mL) and 40 µL DNA  
301 RELEASE BUFFER, to the samples (including the “input DNA” vial).

302 32. Cover the sample wells with strip caps and incubate at 65 °C in a water bath for 15 minutes.  
303 Following incubation at 65 °C do a quick spin to collect all suspension at the bottom of the plate.

304 33. Add **40 µL** of the **REVERSE BUFFER** to the samples and to a vial labelled as “input DNA”; mix and  
305 re-cover the wells with strip caps and incubate at 65 °C in a water bath for 90 minutes. Quick  
306 spin plate at RT.

307 34. Combine solution from the same histone antibody (2 wells for Histone H3 and 3 wells for  
308 Histone H3 modified).

### 309 **DNA purification with AMPure Beads**

310 35. Add 1.8X volume of AMPure XP beads to IP enriched and input DNA.

311 **NOTE:** This step will bind DNA fragments size from 100 bp and larger.

312 36. Mix reagent and sample thoroughly by **pipette mixing ten times**.

313 37. Let mixed samples incubate for 15 minutes at room temperature for maximum recovery.

314 **NOTE:** pipette mixing is preferable to vortexing as it tends to be more reproducible. The  
315 colour of the mixture should appear homogenous after mixing.

- 316 38. Place on a magnetic rack for 5 minutes (wait for solution to clear before proceeding to the next  
317 step).
- 318 39. With tube still in the magnetic rack, aspirate the clear solution from tube and discard.
- 319 40. Keep the sample in magnetic rack and add 1 mL of freshly prepared 70 % ethanol.
- 320 41. Incubate for 30 seconds at room temperature. Aspirate out the ethanol and discard.
- 321 42. Repeat ethanol wash one more time.
- 322 43. Illumina recommended at least 15 minutes drying time but longer drying time may be required.
- 323 **NOTE:** ensure all traces of ethanol are removed but avoid over-drying the beads, which will  
324 significantly decrease elution efficiency (beads will appear cracked if over dried).
- 325 44. Remove the tube from the magnetic rack, add 10  $\mu$ L TElowE and pipet up and down several  
326 times until pellet beads are completely resuspended.
- 327 **NOTE:** Standard TE **must not be used** at this step.
- 328 45. Incubate at room temperature for 2 minutes. Place in the magnetic rack for 5 minutes.
- 329 46. Transfer 9  $\mu$ L of the supernatant to a 0.2 mL PCR tube.
- 330 47. Repeat step 44-46 once. DNA is now ready for use or store at  $-20^{\circ}\text{C}$ .

### 331 **Sequencing**

332 The library was constructed using NEBNext<sup>®</sup> Ultra<sup>™</sup> II DNA Library Prep Kit for Illumina<sup>®</sup> following  
333 manufacturer's low-input ChIP-seq protocol (**Supplementary Information S3**). The library for input  
334 and histone H3-enriched DNA each from March (water- and H<sub>2</sub>CN<sub>2</sub>-treated), May and August  
335 samples were sequenced at Genewiz Genomics Centre (Suzhou, China) as pair-end (PE), 150 bp for  
336 an average of 40 million of reads per sample. Raw reads were trimmed for quality and adaptors  
337 using Trimmomatic v0.39 (Bolger et al., 2014). Post-trimming read quality was assessed using FastQC  
338 and results were aggregated using MultiQC (Ewels et al., 2016). The remaining reads were mapped  
339 to the 12X V1 *Vitis vinifera* PN40024 reference genome (Jaillon et al., 2007) using the Burrows-  
340 Wheeler Aligner (BWA) (Li et al., 2009). Peak calling was conducted using MACS2 software version  
341 2.1.0 (<https://github.com/taoliu/MACS>) with cut off q-value < 0.05. The annotatePeaks.pl algorithm  
342 of the HOMER (Hypergeometric Optimization of Motif EnRichment) suite of tools (Heinz et al., 2010)  
343 was used to annotate the peaks. DeepTools (Ramírez et al., 2016) was used to process the mapped  
344 reads data for creating normalized coverage files in standard bedGraph and bigWig file formats for  
345 visualisation and comparison between different files. Functional category enrichment was  
346 performed for genes that were enriched by histone H3 using topGO package following a grapevine-  
347 specific functional classification of 12X V1 predicted transcript (Grimplet et al., 2012) with  
348 modification according to the GO database (Ashburner et al., 2000). A Fisher's exact test ( $P < 0.05$ )  
349 was carried out in topGO to compare each study list with the list of total non-redundant transcript

350 housed in grapevine 12X V1 gene predictions (Grimplet et al., 2012). The gene ontology GO terms  
351 were further simplified using REVIGO allowing similarity of 0.5 (Supek et al., 2011).

## 352 Results

### 353 Crosslinking by vacuum infiltration

354 Infiltration with 15 minutes cycled vacuum (5 min vacuum/release/mix × 3) and without vacuum was  
355 compared to determine a suitable infiltration method for grapevine buds. Complete infiltration was  
356 indicated by the movement of buds to the bottom of the tube as the buds' density become higher  
357 after infiltration of crosslinking buffer (**Figure 3**).

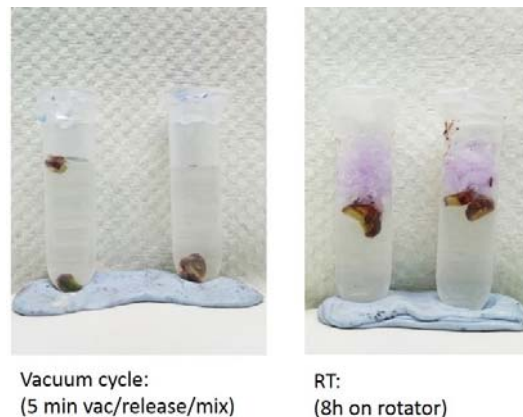

358 **Figure 3.** Fixative infiltration optimisation. Buds were cut into half before immersed into the fixative  
359 solution. **Left:** cycled vacuum was applied by performing three cycles of 5 minutes vacuum, release,  
360 and mix at room temperature. **Right:** a stopper (light purple) was placed on top of the solution the tubes were left on a rotator for 8 hour at  
361 room temperature. An efficient penetration of the fixative was evident after vacuum indicates by  
362 increasing of the bud density which causes buds sunk into the bottom of the tube. Cycled vacuum  
363 method also allows short crosslinking process which is preferred for CHIP analysis.  
364  
365

366 The phenol:chloroform:isoamyl alcohol (PCI) solution separates nucleic acid and protein based on its  
367 solubility in the solvents, i.e. nuclei acid is soluble in aqueous phase while protein in organic phase.  
368 Excessive crosslinking or ineffective reverse crosslinking will retain interaction between DNA and  
369 protein and therefore reduce the amount of DNA in the aqueous phase because the protein-DNA  
370 complex will be soluble in the organic phase instead. Crosslinking efficiency of our protocol was then  
371 assessed by comparing amount of DNA in the aqueous phase from crosslinked and non-crosslinked  
372 bud, treated with or without reverse crosslinking. In non-crosslinked bud (**Figure 4, lane 1-3**), DNA  
373 was soluble in the aqueous phase with or without reverse crosslinking treatment. In contrast, when  
374 crosslinking was performed, DNA can only be recovered from the aqueous phase if reverse  
375 crosslinking procedure was conducted (**Figure 4, lane 6**). The overnight reverse crosslinking  
376 procedure can be done as an alternative to a shorter duration without affecting DNA recovery

377 (Figure 4, lane 7). Absence of DNA at lane 5 confirmed the successful crosslinking procedure which  
378 maintains the protein-DNA interaction, while presence of DNA at lane 6-7 demonstrates efficiency of  
379 our crosslinking allowing release of DNA from protein.

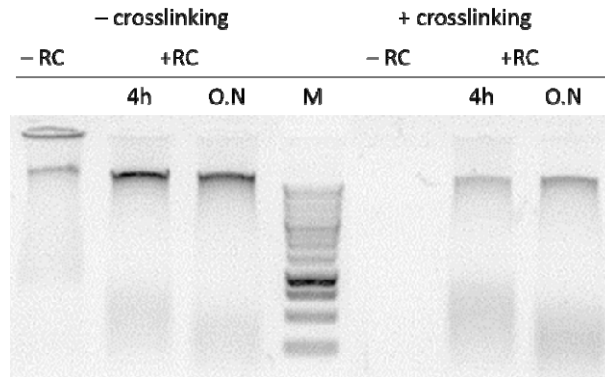

380  
381 **Figure 4.** Crosslinking and reverse crosslinking efficiency. Nuclear extract was prepared from  
382 grapevine buds without (-) **crosslinking** and with (+) **crosslinking** treatment. Grapevine buds were  
383 crosslinked in crosslinking buffer containing 1% formaldehyde for 15 minutes (3×5 minutes vacuum  
384 cycles) at room temperature. The sample was **reverse crosslinking (+RC)** for 4 hour and over the  
385 night (O/N) or **not (-RC)**. DNA was purified using phenol/chloroform extraction followed by ethanol  
386 precipitation. DNA recovery was compared between samples with and without crosslinking.

### 387 **Chromatin yield and nuclei integrity**

388 Disruption of antigen-antibody interaction mainly avoided in most ChIP protocols by using 1 % SDS in  
389 lysis buffer and further dilute the chromatin suspension after DNA fragmentation to reduce the SDS  
390 concentration to 0.1%. We obtained the highest DNA yield using 1 % SDS (**Figure 5, lane 3-4**);  
391 however, a considerable increase of DNA yield was observed after application of 6 minutes of  
392 sonication in sample lysed using low detergent concentration (**Figure 5, lane 1-2 and 5-6**. An aliquot  
393 of six minutes sonicated nuclei suspension (**see procedure, step 16**) was stained with DAPI (1 µg/  
394 mL) and subjected to microscopic observation to assess integrity of the nuclei. The micrograph  
395 showed a uniform, intact and well-separated nucleus (**Figure 6**).

396

397

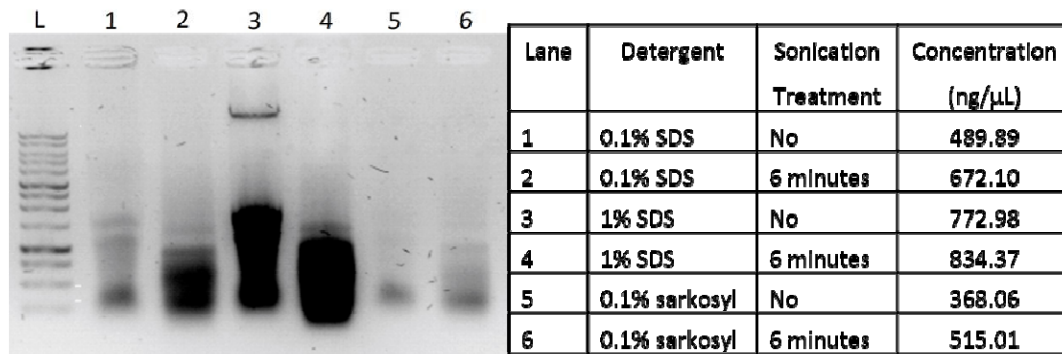

398

399

400

401

**Figure 5.** The combination of type and concentration of detergent in the lysis buffer and application of sonication resulted in a different yield of DNA. L: 1Kb DNA ladder (Promega #G5711) in 1% agarose gel, DNA quantification was performed using a NanoDrop 1000.

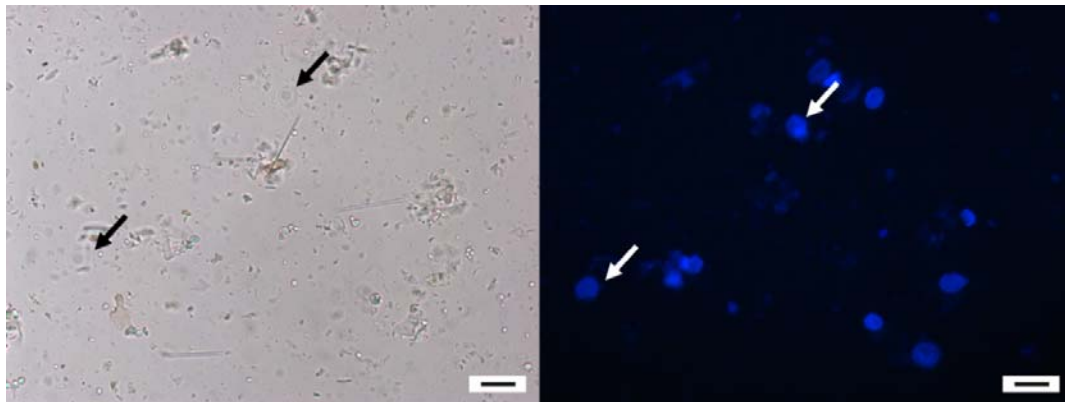

402

403

404

405

406

**Figure 6.** Nuclei integrity assessment by examination under a microscope. DAPI stain DNA specifically at the A-T rich region and will emit blue fluorescence light which can be observed using an epifluorescence microscope. The image was taken using DAPI filter (exciter filter BP 365/12, chromatic beam splitter FT 395, and barrier filter LP 397). Bar = 5  $\mu$ m

407

#### DNA fragmentation

408

409

410

411

412

413

414

A sonicator setting to produce an average of 300 bp fragment was used, following the default setting provided by Covaris S220 Focussed-ultrasonicator manufacture. In general, short DNA fragments were gradually accumulated as sonication duration increased (**Figure 7**). After 8 minutes of sonication, the average fragment size was not changed coincided with an increase of fragment within 200-400 bp range. Increasing the duration of sonication to 10 minutes, the accumulation of DNA fragments in the 200-400 bp range increased without causing further fragmentation of the short DNA.

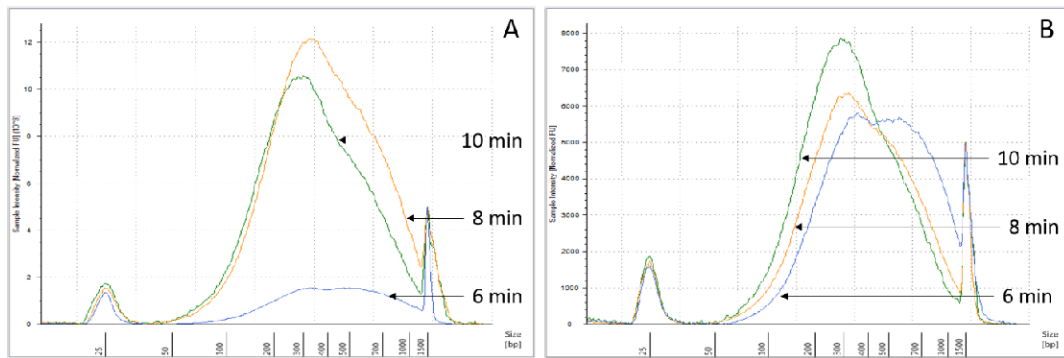

415  
416 **Figure 7.** Optimisation of chromatin fragmentation. Chromatin fragmentation was optimised to  
417 obtain suitable DNA fragment size for ChIP-seq, i.e. 200-400 bp. Chromatin extracted using 0.1% (A)  
418 and 1% SDS (B) were sonicated for 6 (blue), 8 (yellow) and 10 (green) minutes. Distribution of DNA  
419 fragment size was analysed using Agilent Bioanalyzer. Accumulation of smaller DNA fragment  
420 was linear to sonication duration with suitable average fragment size was obtained after 8 minutes, and  
421 more accumulation of fragment size from 200-400 bp observed after 10 minutes sonication.

#### 422 **Yield of immunoprecipitated-DNA**

423 Three different methods to purify the immunoprecipitated-DNA were tested in which the lowest  
424 DNA recovery was produced by column purification method while the paramagnetic beads (AMPure  
425 XP) resulted the highest DNA yield (Table 1). Therefore, we substitute the column purification from  
426 the original Abcam ChIP kit protocol with purification using AMPure XP beads (see procedure step  
427 35). Generally, we enriched 10 % of input DNA by histone H3 and only 1 % by modified histone H3  
428 antibody using 5- or 10-grams buds to performed ChIP experiment for 3 antibodies (Table 2). The  
429 amount of enriched-DNA from the modified histone H3 was considered too low for protocol  
430 validation using quantitative polymerase chain reaction (ChIP-qPCR) or conventional library  
431 construction for several reasons. First, our qPCR titration experiment showed that the lowest DNA  
432 concentration that can be detected by the qPCR machine should be no less than 0.1 ng/  $\mu$ L  
433 (Supplementary Information Table S1). Second, there was no available positive control DNA target  
434 region for native- or modified-histone H3 in grapevine that could be used for ChIP protocol  
435 validation by qPCR. Lastly, library construction results were highly variable when DNA template was  
436 less than five ng. Based on these results, we suggest that 10 grams of buds ( $\pm$  400 buds) may  
437 sufficient for one ChIP experiment only, i.e. immunoprecipitation of one protein of interest (e.g.  
438 modified histone H3) and one control (e.g. histone H3 or IgG).

439



440

441

**Table 1.** The yield of DNA using three different purification method.

| Purification method               | DNA conc.*<br>(ng/ $\mu$ L) | DNA yield<br>( $\mu$ g/grm) |
|-----------------------------------|-----------------------------|-----------------------------|
| Abcam kit column purification     | 0.71                        | 0.14                        |
| Phenol/Chloroform/Isoamyl alcohol | 6.56                        | 1.31                        |
| AMPure XP beads                   | 31.53                       | 6.31                        |

442

Note: DNA concentration was measured using Qubit fluorometer

443

444

**Table 2.** The average yield of input and ChIP-enriched DNA resulted from ChIP experiment using 5

445

and 10 grams of bud tissue for chromatin extraction (n = 3)

| Sample name    | 5 grams    | 10 grams   |
|----------------|------------|------------|
|                | Yield (ng) | Yield (ng) |
| MH_input       | 274.8      | 398.7      |
| MH_histone H3  | 32.0       | 29.9       |
| MH_H3K4me3     | 1.1        | 3.2        |
| MH_H3K27me3    | 6.2        | 3.2        |
| MW_input       | 305.6      | 412.2      |
| MW_histone H3  | 28.2       | 36.8       |
| MW_H3K4me3     | 1.3        | 2.8        |
| MW_H3K27me3    | 1.9        | 3.5        |
| May_input      | 244.7      | 305.3      |
| May_histone H3 | 19.6       | 24.5       |
| May_H3K4me3    | 1.1        | 2.4        |
| May_H3K27me3   | 2.8        | 2.9        |
| Aug_input      | 264.4      | 285.7      |
| Aug_histone H3 | 16.7       | 13.4       |
| Aug_H3K4me3    | 0.9        | 2.5        |
| Aug_H3K27me3   | 1.4        | 2.3        |

446

Abbreviations: MH, March H<sub>2</sub>CN<sub>2</sub> treated buds, MW, March water treated buds.

447

Note: On May and August buds were only treated with water.

448

### Antibody validation

449

Antibody recognition in grapevine buds was confirmed by Western blot analysis of grapevine buds

450

nuclear extract recognising a ~17 kDa band corresponding to predicted molecular weight of histone

451

H3 and H3K4me3. The ImageJ software was used to estimate the signal intensity produced by each

452

antibody (data not shown).

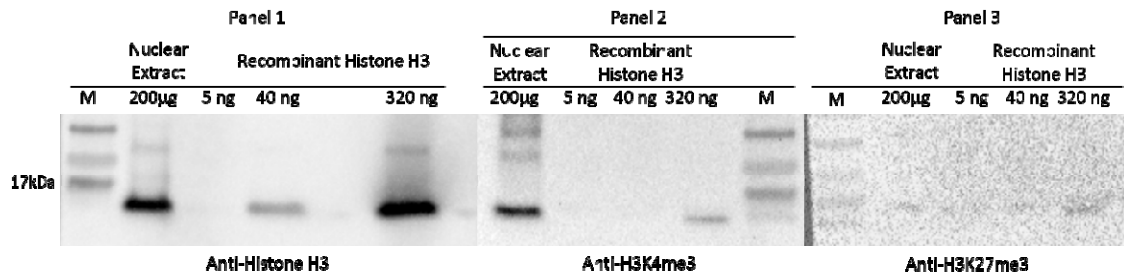

453

454

455

456

457

458

**Figure 8.** Representative western blotting assay for ChIP-antibody validation. Three antibodies used in ChIP assay were used for immunoblotting against nuclear extract prepared from grapevine buds and recombinant histone H3 at the concentration indicated in the image above. All antibodies were considered to pass validation test with detection of histone H3 protein and negative signal in H3K4me3 and H3K27me3 protein at 40 ng.

459

460

461

462

463

464

465

466

467

Immunoblot against anti-histone H3 showed detection limit of the antibody is around 40 ng and 200 µg nuclear extract containing a little less than 320 ng histone H3 protein (**Figure 8, panel 1**). Anti-H3K4me3 passed the test showing absence of signal against 40 ng recombinant histone H3 protein (unmodified), and nuclear signal was about the half of nuclear signal produced against histone H3 antibody (**Figure 8, panel 2**). A false-positive signal observed against 320 ng recombinant histone H3 protein was observed; however, the intensity of the signal is no more than one-tenth the nuclear signal. No signal was observed in the nuclear extract tested against the anti-H3K27me3. We recognise that the lack of signal did not definitively indicate failure of the antibody, as this may result from low abundance of the modified histone in the tissue used for this test (**Figure 8, panel 3**).

468

### Histone H3 occupancy

469

470

471

472

473

474

475

476

477

478

We generated an average 40 million 150 bp paired end reads from one replicate each of the histone H3-enriched and input DNA libraries of water-treated March (3W), May (5W), August (8W), and H<sub>2</sub>CN<sub>2</sub>-treated March buds (3H) buds. Although statistical comparisons cannot be made, it is worthwhile describing the trends. About 90 % of reads remained following trimming and were mapped uniquely to grapevine reference genome (**Supplementary Information Table S2**). Here, we showed a peak binding distribution of histone H3 at regions 4000 bp up- and down-stream of TSS in each condition. The highest occupancy was observed at the genic (exon, intron, or intergenic) region (**Figure 9**). ChIP peak calling analysis identified a different number of peaks at each condition, with the highest found in the May and H<sub>2</sub>CN<sub>2</sub>-treated March conditions, and the lowest in the water-treated March and August conditions (**Figure 9**).

479

480

481

A comparison between nucleosome occupancy and gene expression in *Arabidopsis* showed that genes with higher transcript abundance tend to be relatively unoccupied by nucleosomes at the promoter area, but relatively enriched in the genic region immediately downstream of the TSS

482 (Valouev et al., 2011; Li et al., 2014b). We then restricted the Venn analysis and gene ontology (GO)  
483 enrichment to gene identifiers that were only enriched at the genic region (not the promoter  
484 region). The Venn diagram analysis shows that only few genes were commonly identified across  
485 samples, except for the May condition (5W) and March H<sub>2</sub>CN<sub>2</sub> treatment (3H), with 247 common  
486 genes (**Figure 9**). The GO enrichment for gene identifiers at each condition is summarised using  
487 Treemap generated by REVIGO (**Supplementary Information Figure S1**). Relatively few biological  
488 processes were enriched in water-treated March and August condition buds by comparison with the  
489 May condition and buds treated with H<sub>2</sub>CN<sub>2</sub>. Categories related with meristem developmental state  
490 were enriched in water-treated March and May condition represented by embryonic morphogenesis  
491 (GO:0048598) in March and post-embryonic development (GO:0009791) in May. Meanwhile, the  
492 response to cold (GO:0009409) category was enriched coincident with prolonged exposure to cold in  
493 the August condition. Enrichment of categories related with cell growth (GO:0016049) and cell  
494 differentiation (GO:0030154) was seen in H<sub>2</sub>CN<sub>2</sub>-treated buds (**Supplementary Information**  
495 **Table S4**), suggesting regulation of growth at multiple levels. Further, we performed GO enrichment  
496 for the common gene identifiers found in May and H<sub>2</sub>CN<sub>2</sub>-treated buds (**Figure 10, Supplementary**  
497 **Information Table S5**). The results showed enrichment of categories related with response to  
498 starvation (GO:0042594), post-embryonic development (GO:0009791), and the regulation of phase  
499 transitions from vegetative to reproductive (GO:0048510) in both conditions. The genes associated  
500 with the enriched category were found to be involved in autophagy, flowering time, reactive oxygen  
501 species detoxification, sugar signalling, ABA-mediated signalling, and pleiotropic responses (**Table 3**).

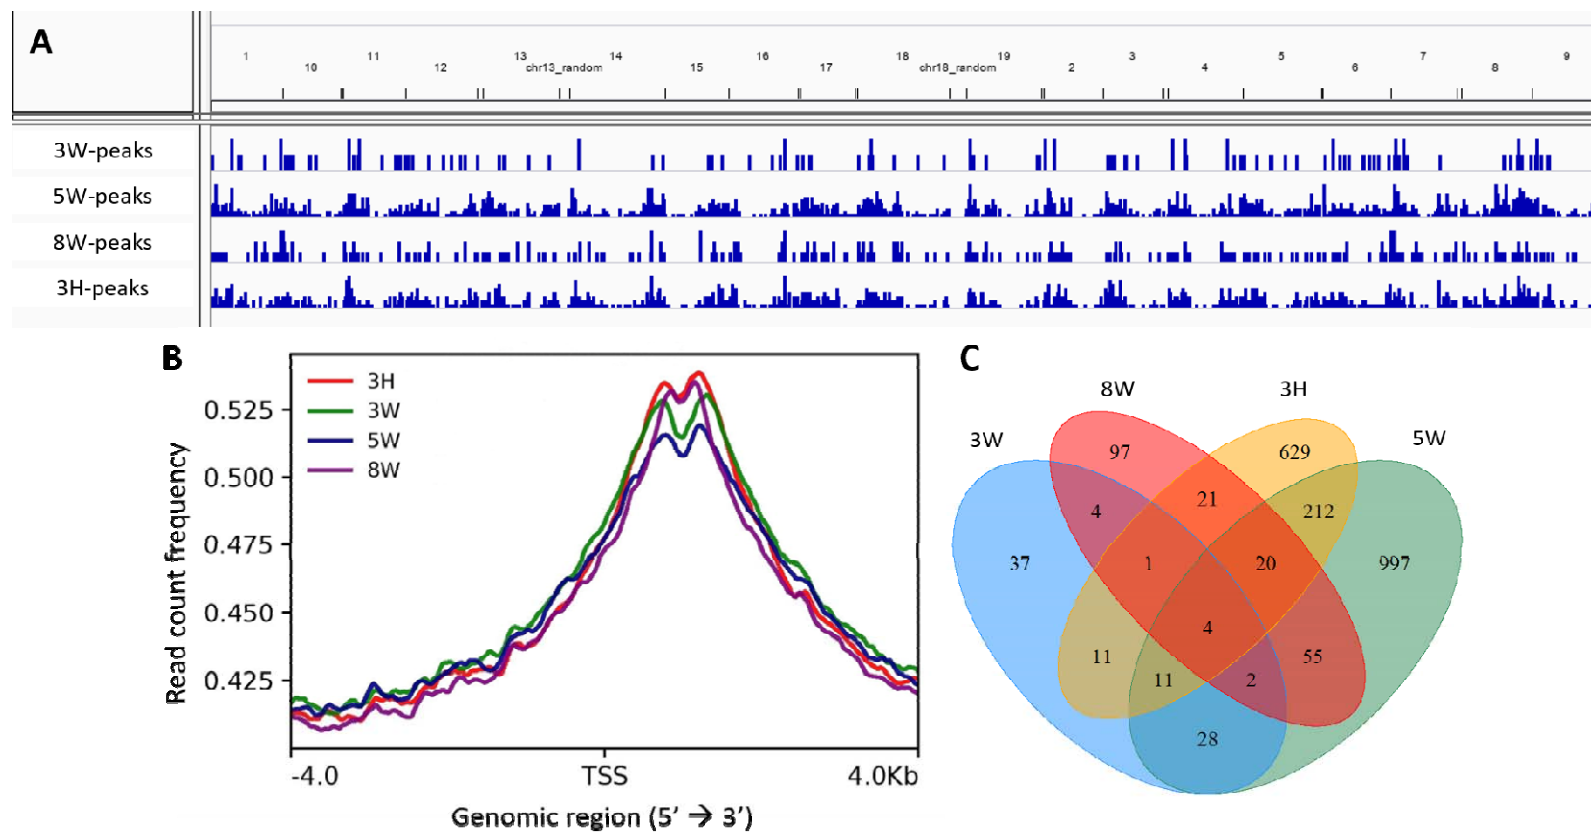

502

503 **Figure 9.** Chromatin immunoprecipitated-DNA peak analysis. **(A)** Distribution of histone H3 peaks along *Vitis vinifera* genome at each condition. **(B)** The average  
504 profile of ChIP peak binding at the transcription start site (TSS) region showing read count frequency range from -4000 to 4000 bp. **(C)** The Venn diagram of genes  
505 identified downstream TSS from buds collected in March, May, August treated with water and March buds treated with H<sub>2</sub>CN<sub>2</sub>.

506

REVIGO Gene Ontology treemap – 5W:3H Intersection

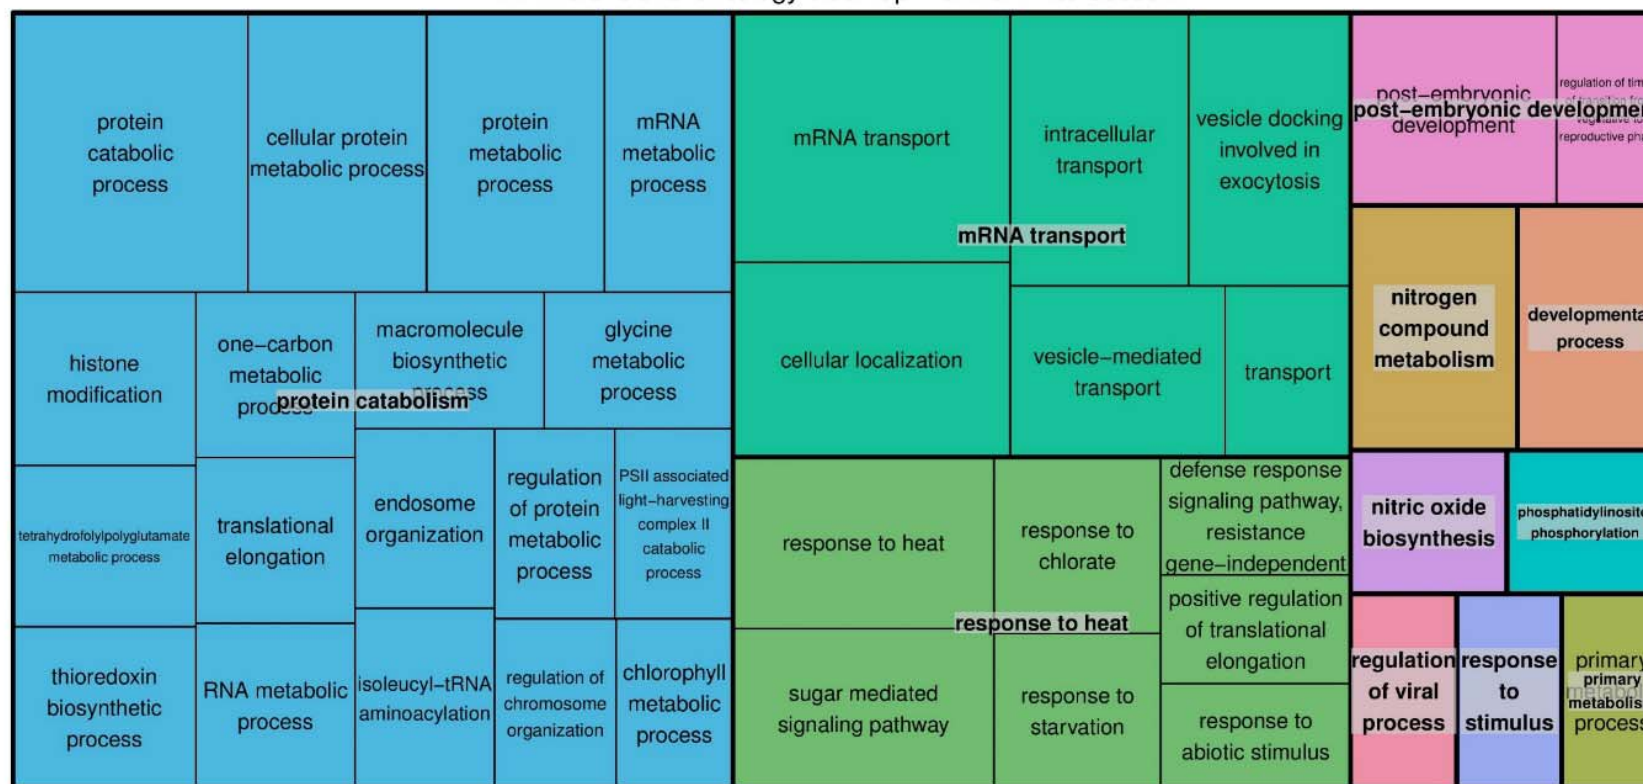

507

508

509

510

511

512

**Figure 10.** Functional category enrichment of genes associated with histone H3 commonly found in May, water-treated buds and March, H<sub>2</sub>CN<sub>2</sub>-treated buds. The highly redundant list of gene ontology (GO) terms is summarised and visualised using the TreeMap of REVIGO. The TreeMap view show two hierarchical level of GO terms. First, the semantically similar terms are grouped it to a representative subset (a non-redundant terms) visualised in a single rectangular. Second, the representative subsets are then clustered into a more general terms (printed over the box graphic) visualised by colours. Box size reflect the *p*-value of each non-redundant term.

513 **Table 3.** Gene associated with enriched category of common gene found in May and H<sub>2</sub>CN<sub>2</sub>-treated buds.

| Vv.ID             | At.ID     | Associated GO category                                                                                            | Functional.annotation                   | Note                                                                                                                            | Reference                                        |
|-------------------|-----------|-------------------------------------------------------------------------------------------------------------------|-----------------------------------------|---------------------------------------------------------------------------------------------------------------------------------|--------------------------------------------------|
| VIT_17s0000g07160 | AT5G61150 | Response to abiotic stimulus, response to heat ( <b>vernalization response</b> )                                  | Vernalization independence 4 (VIP4)     | Cold-independent regulator of flowering-time genes                                                                              | Zhang and Nocker 2002                            |
| VIT_17s0000g09980 | AT3G48430 | Post-embryonic developmental, developmental process, <b>histone modification</b>                                  | Relative of early flowering 6 (REF6)    | regulating flowering time through histone modification at Flowering Locus C (FLC) chromatin and demethylate histone 3 lysin 27. | Noh et al., 2004;<br>Lu et al., 2011             |
| VIT_05s0124g00250 | AT2G31650 | Post-embryonic developmental, developmental process, <b>histone modification</b>                                  | Histone-lysine N-methyltransferase ATX1 | An Arabidopsis homolog of trithorax factor regulating flower organogenesis through histone 3 lysine 4 trimethylation.           | Pien et al., 2008;<br>Choi et al., 2014          |
| VIT_01s0011g02120 | AT5G23150 | Developmental process, <b>regulation of timing of transition from vegetative to reproductive phase</b>            | Enhancer of AG-4 2 (HUA2))              | Activate FLC expression and enhance AGMOUS function                                                                             | Chen and Mayerowitz, 1999;<br>Doyle et al., 2005 |
| VIT_02s0012g01930 | AT1G32230 | Post-embryonic developmental, developmental process, response to abiotic stimulus, <b>response to superoxide.</b> | Radical-induced cell death1 (RCD1)      | Involved in stress-induced morphogenic response (SIMR) and maintaing meristematic fate by controlling redox balance.            | Teotia and Lamb, 2011;<br>Brosche et al., 2014   |
| VIT_07s0104g00320 | AT3G63080 | Post-embryonic developmental, developmental process, <b>response to stimulus.</b>                                 | Glutathione peroxidase 4                | Reactive oxygen species detoxification process                                                                                  | Milla et al., 2003                               |
| VIT_04s0044g01750 | AT2G17420 | Post-embryonic developmental, developmental process,                                                              | Thioredoxin reductase 2                 | Reactive oxygen species detoxification process                                                                                  | Cha et al., 2015;<br>Daloso et al., 2015         |

| Vv.ID             | At.ID     | Associated GO category                                                               | Functional.annotation                                                            | Note                                                                                                                                       | Reference                   |
|-------------------|-----------|--------------------------------------------------------------------------------------|----------------------------------------------------------------------------------|--------------------------------------------------------------------------------------------------------------------------------------------|-----------------------------|
| VIT_14s0060g02380 | AT3G62770 | thioredoxin reduction<br>(response to superoxide).<br><b>Response to starvation.</b> | Autophagy 18 ATG18d                                                              | Required for autophagosome formation during nutrient deprivation or senescence and degradation of oxidase protein during oxidation stress. | Xiong et al., 2005 and 2007 |
| VIT_05s0077g02310 | AT4G15900 | Post-embryonic developmental, <b>mediated pathway.</b>                               | <b>sugar signaling</b><br>PP1/PP2A phosphatases<br>pleiotropic regulator<br>PRL1 | A nuclear WD-protein functions as a pleiotropic regulator of glucose and hormone responses during development in Arabidopsis.              | Nemeth et al., 1998         |
| VIT_18s0001g06310 | AT1G78290 | <b>Response to abiotic stimulus.</b>                                                 | SnRK2-8                                                                          | Involved in Abscisic Acid (ABA)-dependent growth by regulating expression of ABA insensitive 3 transcription factor                        | Wu et al., 2019             |

515 **Discussion**

516 **Optimisation conditions**

517 *Plant Material*

518 The amount of tissue used in ChIP experiment with plant tissue varies depending on tissue type.  
519 Several early studies used 100 grams tissue per ChIP experiment (Ascenzi and Gantt, 1999; Chua et  
520 al., 2001) but recent improvements have enabled efficient ChIP with 1-5 grams, or  $1 \times 10^5$  purified  
521 nuclei (Gendrel et al., 2005; Deal and Henikoff, 2011). The axillary buds of grapevine are  
522 heterogeneous organs consisting of multiple vegetative and reproductive meristems and leaves,  
523 covered in trichome hairs (**Figure 11**). Considering that the buds consist of very little green tissue, we  
524 expected that nuclear density may be low. Our experiment demonstrated that 400 buds ( $\pm 10$   
525 grams) was only enough for ChIP experiment using one protein of interest (e.g. modified histone H3)  
526 and one control (e.g. histone H3 or IgG).

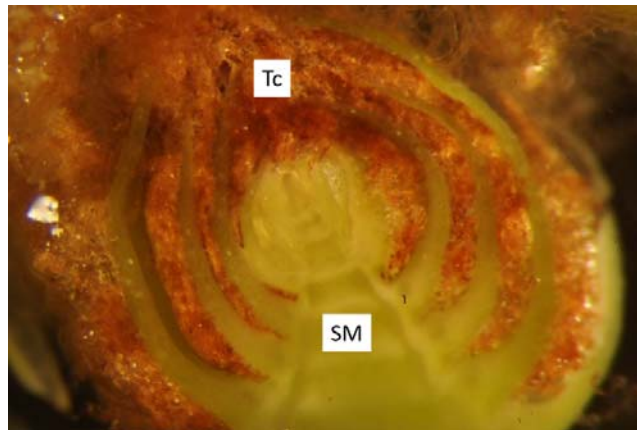

527  
528 **Figure 11.** Anatomy of primary meristem the grapevine axillary bud. Trichome (**Tc**) hairs are shown  
529 as the brown-colour structures which surrounds the green tissue (**SM**, shoot meristem) of the  
530 axillary bud.

531 *Crosslinking*

532 Optimising the incubation conditions for crosslinking is crucial for successful and efficient  
533 crosslinking (Orlando, 2000). A short incubation duration for crosslinking is preferred in a ChIP  
534 experiment. Established protocol with yeast (Shivaswamy and Iyer, 2007), alga (Strenkert et al.,  
535 2011), animal (Browne et al., 2014) or plant (Li et al., 2014a) cells usually apply 10-30 minutes  
536 incubation for crosslinking procedure. However, the hair-like structures inside buds create air spaces  
537 which could impede penetration of the crosslinking solution. The application of a vacuum cycle  
538 procedure, was used here to change the pressure around the buds and remove entrapped air, thus  
539 allowing more efficient infiltration (Li et al., 2014a; Clode, 2015). To test the efficiency of our vacuum  
540 infiltration technique, we performed de-crosslinking followed by DNA extraction using the



541 phenol:chloroform: isoamyl-alcohol (PCI) method. An optimal crosslinking must allow reversal of the  
542 process by heating (Das et al., 2004) and should result a maximum recovery of DNA by the PCI  
543 extraction (Haring et al., 2007; Ricardi et al., 2010). We conclude that the crosslinking duration  
544 should be limited to a maximum of 30 minutes and suggest performing crosslinking in batches, i.e.  
545 15 minutes for excising buds from the canes followed by 15 minutes crosslinking.

#### 546 *Chromatin extraction*

547 In lignified tissues, the presence and composition of secondary metabolites creates a requirement to  
548 optimise extraction conditions, particularly the composition of the homogenisation buffer and  
549 presence and concentration of detergent used for cell lysis (Li et al., 2014a). A powerful  
550 homogeniser such as the ULTRA-TURRAX (IKA, Germany) is also strongly recommended to improve  
551 tissue homogenisation. Moreover, polyvinylpyrrolidone (PVP) has been used routinely in nuclei acid  
552 extraction from tissue with high polyphenol content (Lodhi et al., 1994; Porebski et al., 1997).  
553 Secondary metabolites, such as polyphenols and tannins, can bind to DNA upon cell lysis and  
554 contaminated DNA may present problem for downstream analysis, such as DNA library construction  
555 for sequencing. The PVP binds polyphenols through hydrogen bonding and can then be removed  
556 from tissue homogenate by discarding the supernatant containing PVP-polyphenols after  
557 centrifugation step (John, 1992). There are also several considerations in the choice and amount of  
558 detergent. Typically, an anionic detergent such as sodium docecyl sulfate (SDS) is used, however  
559 while concentrations > 0.1 % SDS (w/v) will improve nuclear isolation, this may disrupt the antibody-  
560 antigen interaction due to protein denaturation (Privé, 2007). Moreover, high concentrations of  
561 ionic detergent tend to result in formation of precipitates at low temperature, risking inefficient cell  
562 lysis and co-precipitation with the DNA (Linke, 2009). Two concentration of SDS commonly used in  
563 ChIP assays were tested here, i.e. 0.1 % and 1 %, to determine the optimum condition resulting in  
564 the highest yield of DNA for immunoprecipitation. Also, we tested 0.1 % sarkosyl, a milder anionic  
565 detergent which is structurally similar to SDS but remains soluble under low temperature, as a  
566 comparison to the widely use SDS (Linke, 2009). Our result show that lower detergent concentration,  
567 both ionic and anionic, resulting a low DNA yield (**Figure 5, lane 1, 3, and 5**). However, the result was  
568 improved after sonication was applied for several minutes.

#### 569 *DNA fragmentation*

570 The most common procedures to shear DNA for ChIP assay is by sonication (Orlando, 1997 and  
571 2000) or micrococcal nuclease treatment (O'Neil et al., 2003); the former method is mainly used for  
572 crosslinked ChIP experiment. Ideally, DNA is sheared into small fragment range from 200 to 600 bp  
573 (Park, 2009). Sonication is highly variable and difficult to optimise. A titration approach is commonly

574 required to find the best sonication duration and settings. By considering this, we then performed a  
575 test to determine the sonication duration that will produce the desired fragment size. Here, we use  
576 S220 Focused-Ultrasonicator (Covaris, USA) and followed manufacture recommendation to generate  
577 homogenously distributed ~300 bp DNA fragment, i.e. 5 % Duty Cycle, 4 intensity, 140 W peak  
578 incident power, 200 cycles per burst. We then tested three sonication duration, i.e. 6, 8 and 10  
579 minutes. Fragmented DNA was then analysed using TapeStation® (Agilent, Australia) and quantified  
580 using Qubit (Thermo Fischer Scientific, Australia) as both methods provide a more sensitive and  
581 accurate measurement comparatively to measurement using agarose gel or nanodrop respectively  
582 (Simbolo et al., 2013). The sonication step served two purposes in our protocol, i.e. improve cell lysis  
583 and DNA fragmentation. Aggregated nuclei are a common problem when isolating nuclei from tissue  
584 with high tannic acid content (Loureiro et al., 2006) and clumping nuclei will also reduce efficiency of  
585 DNA fragmentation (Arrigoni et al., 2015). Development of a standard ChIP protocol using animal  
586 cells also demonstrates that mild sonication can help to separate clumping cells which then improve  
587 cell lysis process and increased DNA yield (Arrigoni et al., 2015). In agreement with this report, our  
588 result showed that the use of high detergent concentration for cell lysis could be avoided using our  
589 sonication settings. In addition to improve cell lysis, our sonication setting was found to be affected  
590 long DNA more than short DNA. Library construction may increase bias toward short DNA fragments  
591 due to size selection during library construction. Although 10 minutes sonication was sufficient to  
592 shear grapevine chromatin into a suitable size for sequencing (usually within 150-300 bp range), we  
593 suggest to apply 12 minutes sonication in order to obtained a higher amount of DNA fragment  
594 within the 150-300 bp range.

#### 595 *Antibody validation*

596 A specific antibody with high affinity to the protein of interest is a prerequisite for a successful ChIP  
597 experiment (Kungulovski et al., 2015). Antibodies are common tools to study many biological  
598 processes; however, they may also cause problems (Saper and Sawchenko, 2003; Baker, 2015a).  
599 Common problems are (1) recognition of non-target protein due to antibody cross-reactivity, (2)  
600 non-reproducible results due batch-to-batch variation of antibody, and (3) unsuitable application, for  
601 example antibodies that work for western blotting may not suitable for immunoprecipitation (Baker,  
602 2015a). It is imperative to characterise and validate the antibody of choice before commencing an  
603 experiment (Schumacher and Seitz, 2016; Gautron, 2019). Egelhoffer et al. (2011) tested 246 ChIP-  
604 grade antibodies and found many of these antibodies were either non-specific or unsuitable for  
605 ChIP. In order to address this issue, we performed antibody assessment to validate the ChIP  
606 antibody that was used in our experiment. We chose antibodies for histone H3, H3K4me3, and  
607 H3K27me3 on the basis of existing public data on the specificity, in order to meet at least one of the

608 selection criteria. The antibodies chosen had been shown to specifically recognise the antigen in  
609 HeLa cells by the manufacture, in various human or mouse tissue by the ENCODE project and used in  
610 ChIP analysis in barley (Baker et al., 2015b). Recombinant histone H3 and nuclear extract of  
611 grapevine buds were tested against anti-histone H3, anti-H3K4me3, and anti-H3K27me3. Criteria for  
612 an antibody to “pass” specificity by western blotting was adopted from Egelhoffer et al. (2011), i.e.  
613 the tested antibody should produce at least 50 % signal compare to the total nuclear signal and ten-  
614 times higher than any unspecific signal.

### 615 **ChIP-sequencing and Histone H3 occupancy**

616 The outcome from the ChIP experiment is fragments of DNA that specifically interact with the  
617 protein of interest. Identification of the DNA sequence following the immunoprecipitation can be  
618 done by polymerase chain reaction (ChIP-PCR) or quantitative PCR (ChIP-qPCR), microarray (ChIP-  
619 chip), and high-throughput sequencing (ChIP-seq). The endpoint PCR or qPCR is the most widely and  
620 routine identification technique use in ChIP. The pitfall of this technique is that it requires prior  
621 knowledge of regions associated with the protein tested. Rapid improvement of genome-wide  
622 assays using microarray or high-throughput sequencing, provide an alternative DNA assay for species  
623 such as grapevine; in which knowledge about the region occupied by histone H3 or modified histone  
624 H3 is not available. Several reviews outline the superiority of sequencing over microarray for several  
625 reasons, such as higher genome coverage including the repeated sequence and low noise to signal  
626 ratio which commonly found in microarray analysis (Schones and Zhao, 2008; Park, 2009; Furey,  
627 2012). In this study, we performed a ChIP-seq analysis of the histone H3 to evaluate our ChIP  
628 protocol. We also compare and explore the histone H3 occupancy along grapevine bud chromatin  
629 using dormant buds harvested at three different time point. Nevertheless, differential regulation of  
630 histone H3 is beyond the scope of this protocol.

631 Nucleosome (histone octamer) occupancy and positioning have been suggested to play important  
632 roles in regulating gene expression and many additional DNA-related process (Struhl and Segal,  
633 2013). Studies of nucleosome occupancy and positioning in animals, yeast, and plant cells have  
634 demonstrated a bias in nucleosome occupancy positioning towards regions proximal to the  
635 transcription start site (TSS) (Mavrich et al., 2008; Schones et al., 2008; Lee et al., 2017; Zhang et al.,  
636 2019). Furthermore, genome-wide nucleosome occupancy studies in yeast, mammalian and plant  
637 systems showing that the genomic sequence of nucleosome is mostly depleted in the promoter or  
638 transcription termination sites (Field et al., 2018; Fenouil et al., 2012; Liu et al., 2015). In yeast,  
639 nucleosome depletion was found in the homopolymers of deoxyadenosine nucleotides (poly (dA:dT)  
640 tracts) regions, suggesting that the structure of poly (dA:dT) tracts may be resistant to the bending

641 and twisting deformation required to wrap DNA around nucleosomes (Field et al., 2008; Segal and  
642 Widom, 2009 and the reference therein). On the contrary, in mammalian and plant tissues,  
643 promoter regions are mostly GC-rich, hence the nucleosome depletion is tightly associated with CpG  
644 islands (Fenouil et al., 2012; Liu et al., 2015). Our result showing a similar pattern of histone H3  
645 occupancy with those previously reported in study with the histone octamer, i.e. higher preference  
646 occupation at down-stream TSS region. Functional category analysis of gene identifier at the genic  
647 region showed enrichment of process related with meristem development and response to  
648 environment condition at the time of sampling, e.g cell cycle activities. Differential expression and  
649 abundance of histone H3 was reported to correlate well with DNA synthesis and cell cycle activities,  
650 showing highest abundance during early embryogenesis in *Drosophilla* (Shindo and Amodeo, 2019),  
651 or in cycling cells of plant meristems (Kaparos et al., 1992; Terada et al., 1993; Sano and Tanaka,  
652 2005) and at low abundance in quiescent apical buds (Singh et al., 2009). Annotation of the DNA  
653 associated with the histone H3 peaks identified 129, 1691, 291, and 1207 genes for the 3W, 5W, 8W  
654 and 3H conditions (**Supplementary Information Table S3**).

## 655 **Conclusion**

656 We describe the systematic optimisation of detail chromatin immunoprecipitation protocol for  
657 grapevine bud samples. The protocol was developed from ChIP protocol for woody tissue published  
658 by Li et al. (2014a) and then modified according to optimisation results that we performed at each  
659 step of the ChIP protocol; this included the amount of starting material, crosslinking method,  
660 chromatin extraction condition, chromatin shearing duration, validation of antibody, and DNA  
661 purification method. Identification of histone H3 enriched DNA by sequencing, provided an example  
662 for the potential use of this protocol to study the post-translational modification of histone H3 in the  
663 buds of grapevine. Comparing the results from nucleosome occupancy in yeast, human, and  
664 Arabidopsis we validated our ChIP experimental data.

## 665 **Data availability statement**

666 All datasets generated for this study are included in the article/ supplementary material.

## 667 **Author contribution**

668 M.J.C. conceived and supervised the project. D.H. is responsible for data curation, analysis, and  
669 investigation. Optimisation of the ChIP procedure was performed by D.H. in collaboration with J.C.  
670 and R.L. T.C.\* performed the sequencing and data processing. D.H. wrote the manuscript with  
671 constructive comment from M.C. and T.C.\* All authors contributed to the article and approved the  
672 submitted version. \*T.C. deceased prior to submission but after approving the submitted  
673 manuscript.

674 **Funding**

675 D.H. was a recipient of The Indonesian Endowment Fund for Education Scholarship. The authors  
676 acknowledge funding support of the Australian Research Council (DP150103211 and FT180100409).  
677 The authors acknowledge the facilities and scientific and technical assistance of the National Imaging  
678 Facility, a National Collaborative Research Infrastructure Strategy (NCRIS) capability, at the Centre  
679 for Microscopy, Characterisation and Analysis, The University of Western Australia.

680 **Acknowledgements**

681 We express deep sadness at the passing of Tinashe Chabikwa and sincere condolences to his family.  
682 We are thankful to Keith Mugford of Moss Wood Wines for enduring support and access to plant  
683 material at often inconvenient times. We are also very grateful to the team of the Centre for  
684 Microscopy, Characterisation and Analysis of the University of Western Australia for technical  
685 guidance.

686

687

688

## References

- Alexa A, Rahnenfuhrer J. topGO: enrichment analysis for gene ontology. R package version. 2010
- Arrigoni L, Richter AS, Betancourt E, Bruder K, Diehl S, Manke T, Bönisch U. Standardizing chromatin research: a simple and universal method for ChIP-seq. *Nucleic Acids Research*. 2015;23;44(7).
- Ascenzi R, Gantt JS. Subnuclear distribution of the entire complement of linker histone variants in *Arabidopsis thaliana*. *Chromosoma*. 1999;108(6):345-55.
- Baker K, Dhillon T, Colas I, Cook N, Milne I, Milne L, Bayer M, Flavell AJ. Chromatin state analysis of the barley epigenome reveals a higher-order structure defined by H3K27me1 and H3K27me3 abundance. *The Plant Journal*. 2015b;84(1):111-24.
- Baker M. Reproducibility crisis: Blame it on the antibodies. *Nature News*. 2015a;521(7552):274.
- Bolger AM, Lohse M, Usadel B. Trimmomatic: a flexible trimmer for Illumina sequence data. *Bioinformatics*. 2014 Apr 1;30(15):2114-2120.
- Brosche M, Blomster T, Salojärvi J, Cui F, Sipari N, Leppälä J, Lamminmäki A, Tomai G, Narayanasamy S, Reddy RA, Keinänen M. Transcriptomics and functional genomics of ROS-induced cell death regulation by RADICAL-INDUCED CELL DEATH1. *PLoS Genetics*. 2014;10(2):e1004112.
- Browne JA, Harris A, Leir SH. An optimized protocol for isolating primary epithelial cell chromatin for ChIP. *PLoS One*. 2014;9(6).
- Browne JA, Harris A, Leir SH. An optimized protocol for isolating primary epithelial cell chromatin for ChIP. *PLoS One*. 2014;9(6):e100099.
- Cha JY, Barman DN, Kim MG, Kim WY. Stress defense mechanisms of NADPH-dependent thioredoxin reductases (NTRs) in plants. *Plant Signaling & Behavior*. 2015;10(5):e1017698.
- Chen X, Meyerowitz EM. HUA1 and HUA2 are two members of the floral homeotic AGAMOUS pathway. *Molecular Cell*. 1999;3(3):349-360.
- Choi SC, Lee S, Kim SR, Lee YS, Liu C, Cao X, An G. Trithorax group protein *Oryza sativa* Trithorax1 controls flowering time in rice via interaction with early heading date3. *Plant Physiology*. 2014;164(3):1326-1337.
- Chua YL, Brown AP, Gray JC. Targeted histone acetylation and altered nuclease accessibility over short regions of the pea plastocyanin gene. *The Plant Cell*. 2001;13(3):599-612.

Clode PL. A method for preparing difficult plant tissues for light and electron microscopy. *Microscopy and Microanalysis*. 2015;21(4):902-909.

Daloso DM, Müller K, Obata T, Florian A, Tohge T, Bottcher A, Riondet C, Bariat L, Carrari F, Nunes-Nesi A, Buchanan BB. Thioredoxin, a master regulator of the tricarboxylic acid cycle in plant mitochondria. *Proceedings of the National Academy of Sciences*. 2015;112(11):e1392-1400.

Das PM, Ramachandran K, VanWert J, Singal R. Chromatin immunoprecipitation assay. *Biotechniques*. 2004;37(6):961-9.

Davis CA, Hitz BC, Sloan CA, Chan ET, Davidson JM, Gabdank I, Hilton JA, Jain K, Baymuradov UK, Narayanan AK, Onate KC. The Encyclopedia of DNA elements (ENCODE): data portal update. *Nucleic Acids Research*. 2017;46.

de la Fuente L, Conesa A, Lloret A, Badenes ML, Ríos G. Genome-wide changes in histone H3 lysine 27 trimethylation associated with bud dormancy release in peach. *Tree Genetics & Genomes*. 2015;11(3):45.

Deal RB, Henikoff S. The INTACT method for cell type-specific gene expression and chromatin profiling in *Arabidopsis thaliana*. *Nature Protocols*. 2011;6(1):56.

Doyle MR, Bizzell CM, Keller MR, Michaels SD, Song J, Noh YS, Amasino RM. HUA2 is required for the expression of floral repressors in *Arabidopsis thaliana*. *The Plant Journal*. 2005;41(3):376-385.

Egelhofer TA, Minoda A, Klugman S, Lee K, Kolasinska-Zwierz P, Alekseyenko AA, Cheung MS, Day DS, Gadel S, Gorchakov AA, Gu T. An assessment of histone-modification antibody quality. *Nature Structural & Molecular Biology*. 2011;18(1):91.

Ewels P, Magnusson M, Lundin S, Käller M. MultiQC: summarize analysis results for multiple tools and samples in a single report. *Bioinformatics*. 2016;32(19):3047-8.

Fenouil R, Cauchy P, Koch F, Descostes N, Cabeza JZ, Innocenti C, Ferrier P, Spicuglia S, Gut M, Gut I, Andrau JC. CpG islands and GC content dictate nucleosome depletion in a transcription-independent manner at mammalian promoters. *Genome Research*. 2012;22(12):2399-2408.

Field Y, Kaplan N, Fondufe-Mittendorf Y, Moore IK, Sharon E, Lubling Y, Widom J, Segal E. Distinct modes of regulation by chromatin encoded through nucleosome positioning signals. *PLoS Computational Biology*. 2008;4(11).

Furey TS. ChIP-seq and beyond: new and improved methodologies to detect and characterize protein-DNA interactions. *Nature Reviews Genetics*. 2012;13(12):840.

Gautron L. On the necessity of validating antibodies in the immunohistochemistry literature. *Frontiers in Neuroanatomy*. 2019;13:46.

Gendrel AV, Lippman Z, Martienssen R, Colot V. Profiling histone modification patterns in plants using genomic tiling microarrays. *Nature Methods*. 2005;2(3):213.

Haque ME, Han B, Wang B, Wang Y, Liu A. Development of an efficient chromatin immunoprecipitation method to investigate protein-DNA interaction in oleaginous castor bean seeds. *PloS One*. 2018;13(5).

Haring M, Offermann S, Danker T, Horst I, Peterhansel C, Stam M. Chromatin immunoprecipitation: optimization, quantitative analysis and data normalization. *Plant Methods*. 2007;3(1):11.

Hecht A, Strahl-Bolsinger S, Grunstein M. Spreading of transcriptional repressor SIR3 from telomeric heterochromatin. *Nature*. 1996;383(6595):92.

Heinz S, Benner C, Spann N, Bertolino E, Lin YC, Laslo P, Cheng JX, Murre C, Singh H, Glass CK. Simple combinations of lineage-determining transcription factors prime cis-regulatory elements required for macrophage and B cell identities. *Molecular Cell*. 2010;38(4):576-589.

Helliwell CA, Wood CC, Robertson M, James Peacock W, Dennis ES. The Arabidopsis FLC protein interacts directly in vivo with SOC1 and FT chromatin and is part of a high-molecular-weight protein complex. *The Plant Journal*. 2006;46(2):183-192.

Iyer VR, Horak CE, Scafe CS, Botstein D, Snyder M, Brown PO. Genomic binding sites of the yeast cell-cycle transcription factors SBF and MBF. *Nature*. 2001;409(6819):533.

Jackson V. Studies on histone organization in the nucleosome using formaldehyde as a reversible cross-linking agent. *Cell*. 1978;15(3):945-954.

Jaillon O, Aury JM, Noel B, Policriti A, Clepet C, Casagrande A, Choisne N, Aubourg S, Vitulo N, Jubin C, Vezzi A. The grapevine genome sequence suggests ancestral hexaploidization in major angiosperm phyla. *Nature*. 2007;449(7161):463.

John ME. An efficient method for isolation of RNA and DNA from plants containing polyphenolics. *Nucleic Acids Research*. 1992;20(9):2381.

Johnson C, Boden E, Desai M, Pascuzzi P, Arias J. In vivo target promoter-binding activities of a xenobiotic stress-activated TGA factor. *The Plant Journal*. 2001;28(2):237-243.

Johnson DS, Mortazavi A, Myers RM, Wold B. Genome-wide mapping of in vivo protein-DNA interactions. *Science*. 2007;316(5830):1497-1502.



Kapros T, Bögre L, Nemeth K, Bakó L, Györgyey J, Wu SC, Dudits D. Differential expression of histone H3 gene variants during cell cycle and somatic embryogenesis in alfalfa. *Plant Physiology*. 1992;98(2):621-625.

Kaufmann K, Muino JM, Østerås M, Farinelli L, Krajewski P, Angenent GC. Chromatin immunoprecipitation (ChIP) of plant transcription factors followed by sequencing (ChIP-SEQ) or hybridization to whole genome arrays (ChIP-CHIP). *Nature Protocols*. 2010;5(3):457.

Klockenbusch C, O'Hara JE, Kast J. Advancing formaldehyde cross-linking towards quantitative proteomic applications. *Analytical and Bioanalytical Chemistry*. 2012;404(4):1057-1067.

Kungulovski G, Mauser R, Jeltsch A. Affinity reagents for studying histone modifications & guidelines for their quality control. *Epigenomics*. 2015;7(7):1185-1196.

Landt SG, Marinov GK, Kundaje A, Kheradpour P, Pauli F, Batzoglou S, Bernstein BE, Bickel P, Brown JB, Cayting P, Chen Y. ChIP-seq guidelines and practices of the ENCODE and modENCODE consortia. *Genome Research*. 2012;22(9):1813-1831.

Lavee S, May P. Dormancy of grapevine buds-facts and speculation. *Australian Journal of Grape and Wine Research*. 1997;3(1):31-46.

Lee JH, Jin S, Kim SY, Kim W, Ahn JH. A fast, efficient chromatin immunoprecipitation method for studying protein-DNA binding in *Arabidopsis* mesophyll protoplasts. *Plant Methods*. 2017;13(1):42.

Leida C, Conesa A, Llácer G, Badenes ML, Ríos G. Histone modifications and expression of DAM6 gene in peach are modulated during bud dormancy release in a cultivar-dependent manner. *New Phytologist*. 2012;193(1):67-80.

Li G, Liu S, Wang J, He J, Huang H, Zhang Y, Xu L. ISWI proteins participate in the genome-wide nucleosome distribution in *Arabidopsis*. *The Plant Journal*. 2014b;78(4):706-14.

Li H, Durbin R. Fast and accurate short read alignment with Burrows–Wheeler transform. *Bioinformatics*. 2009;25(14):1754-1760.

Li W, Lin YC, Li Q, Shi R, Lin CY, Chen H, Chuang L, Qu GZ, Sederoff RR, Chiang VL. A robust chromatin immunoprecipitation protocol for studying transcription factor–DNA interactions and histone modifications in wood-forming tissue. *Nature Protocols*. 2014a;9(9):2180.

Linke D. Detergents: an overview. In *Methods in Enzymology*. 2009;463:603-617. Academic Press.

Liu MJ, Seddon AE, Tsai ZT, Major IT, Floer M, Howe GA, Shiu SH. Determinants of nucleosome positioning and their influence on plant gene expression. *Genome Research*. 2015;25(8):1182-1195.

Lodhi MA, Ye GN, Weeden NF, Reisch BI. A simple and efficient method for DNA extraction from grapevine cultivars and *Vitis* species. *Plant Molecular Biology Reporter*. 1994;12(1):6-13.

Loureiro J, Rodriguez E, Doležel J, Santos C. Flow cytometric and microscopic analysis of the effect of tannic acid on plant nuclei and estimation of DNA content. *Annals of Botany*. 2006;98(3):515-527.

Lu F, Cui X, Zhang S, Jenuwein T, Cao X. Arabidopsis REF6 is a histone H3 lysine 27 demethylase. *Nature Genetics*. 2011;43(7):715.

Mavrich TN, Jiang C, Ioshikhes IP, Li X, Venters BJ, Zanton SJ, Tomsho LP, Qi J, Glaser RL, Schuster SC, Gilmour DS. Nucleosome organization in the *Drosophila* genome. *Nature*. 2008;453(7193):358.

Michaels SD, Amasino RM. FLOWERING LOCUS C encodes a novel MADS domain protein that acts as a repressor of flowering. *The Plant Cell*. 1999;11(5):949-956.

Milla MA, Maurer A, Huete AR, Gustafson JP. Glutathione peroxidase genes in Arabidopsis are ubiquitous and regulated by abiotic stresses through diverse signaling pathways. *The Plant Journal*. 2003;36(5):602-615.

Németh K, Salchert K, Putnoky P, Bhalerao R, Koncz-Kálmán Z, Stankovic-Stangeland B, Bakó L, Mathur J, Ökrész L, Stabel S, Geigenberger P. Pleiotropic control of glucose and hormone responses by PRL1, a nuclear WD protein, in Arabidopsis. *Genes & Development*. 1998;12(19):3059-3073.

Noh B, Lee SH, Kim HJ, Yi G, Shin EA, Lee M, Jung KJ, Doyle MR, Amasino RM, Noh YS. Divergent roles of a pair of homologous Jumonji/Zinc-Finger-class transcription factor proteins in the regulation of Arabidopsis flowering time. *The Plant Cell*. 2004;16(10):2601-2613.

O'Neill LP, Turner BM. Immunoprecipitation of native chromatin: NChIP. *Methods*. 2003;31(1):76-82.

Orlando V, Strutt H, Paro R. Analysis of chromatin structure by in vivo formaldehyde cross-linking. *Methods*. 1997;11(2):205-14.

Orlando V. Mapping chromosomal proteins in vivo by formaldehyde-crosslinked-chromatin immunoprecipitation. *Trends in Biochemical Sciences*. 2000;25(3):99-104.

Park PJ. ChIP-seq: advantages and challenges of a maturing technology. *Nature Reviews Genetics*. 2009;10(10):669.

Pien S, Fleury D, Mylne JS, Crevillen P, Inzé D, Avramova Z, Dean C, Grossniklaus U. Arabidopsis TRITHORAX1 dynamically regulates FLOWERING LOCUS C activation via histone 3 lysine 4 trimethylation. *The Plant Cell*. 2008;20(3):580-588.

Porebski S, Bailey LG, Baum BR. Modification of a CTAB DNA extraction protocol for plants containing high polysaccharide and polyphenol components. *Plant Molecular Biology Reporter*. 1997;15(1):8-15.

Privé GG. Detergents for the stabilization and crystallization of membrane proteins. *Methods*. 2007;41(4):388-397.

Ramírez F, Ryan DP, Grüning B, Bhardwaj V, Kilpert F, Richter AS, Heyne S, Dündar F, Manke T. deepTools2: a next generation web server for deep-sequencing data analysis. *Nucleic Acids Research*. 2016;44.

Reimer JJ, Turck F. Genome-wide mapping of protein-DNA interaction by chromatin immunoprecipitation and DNA microarray hybridization (ChIP-chip). Part A: ChIP-chip molecular methods. In *Plant Epigenetics 2010* (pp. 139-160). Humana Press.

Ricardi MM, González RM, Iusem ND. Protocol: fine-tuning of a Chromatin Immunoprecipitation (ChIP) protocol in tomato. *Plant Methods*. 2010;6(1):11.

Saito T, Bai S, Imai T, Ito A, Nakajima I, Moriguchi T. Histone modification and signalling cascade of the dormancy-associated MADS-box gene, PpMADS 13-1, in Japanese pear (*Pyrus pyrifolia*) during endodormancy. *Plant, Cell & Environment*. 2015;38(6):1157-1166.

Saleh A, Alvarez-Venegas R, Avramova Z. An efficient chromatin immunoprecipitation (ChIP) protocol for studying histone modifications in Arabidopsis plants. *Nature Protocols*. 2008;3(6):1018.

Sano Y, Tanaka I. A histone H3. 3-like gene specifically expressed in the vegetative cell of developing lily pollen. *Plant and Cell Physiology*. 2005;46(8):1299-1308.

Saper CB, Sawchenko PE. Magic peptides, magic antibodies: guidelines for appropriate controls for immunohistochemistry. *Journal of Comparative Neurology*. 2003;465(2):161-163.

Schones DE, Zhao K. Genome-wide approaches to studying chromatin modifications. *Nature Reviews Genetics*. 2008;9(3):179.

Schumacher S, Seitz H. Quality control of antibodies for assay development. *New Biotechnology*. 2016;33(5):544-550.

Segal E, Widom J. Poly (dA: dT) tracts: major determinants of nucleosome organization. *Current Opinion in Structural Biology*. 2009;19(1):65-71.

Shindo Y, Amodeo AA. Dynamics of free and chromatin-bound histone H3 during early embryogenesis. *Current Biology*. 2019;29(2):359-366.

Shivaswamy S, Iyer VR. Genome-wide analysis of chromatin status using tiling microarrays. *Methods*. 2007;41(3):304-311.

Simbolo M, Gottardi M, Corbo V, Fassan M, Mafficini A, Malpeli G, Lawlor RT, Scarpa A. DNA qualification workflow for next generation sequencing of histopathological samples. *PLoS One*. 2013;8(6).

Singh K, Kumar S, Ahuja PS. Differential expression of Histone H3 gene in tea (*Camellia sinensis* (L.) O. Kuntze) suggests its role in growing tissue. *Molecular Biology Reports*. 2009;36(3):537-542.

Solomon MJ, Larsen PL, Varshavsky A. Mapping protein-DNA interactions in vivo with formaldehyde: evidence that histone H4 is retained on a highly transcribed gene. *Cell*. 1988;53(6):937-947.

Song L, Koga Y, Ecker JR. Profiling of transcription factor binding events by chromatin immunoprecipitation sequencing (ChIP-seq). *Current Protocols in Plant Biology*. 2016;1(2):293-306.

Strenkert D, Schmollinger S, Schroda M. Protocol: methodology for chromatin immunoprecipitation (ChIP) in *Chlamydomonas reinhardtii*. *Plant Methods*. 2011;7(1):35.

Struhl K, Segal E. Determinants of nucleosome positioning. *Nature Structural & Molecular biology*. 2013;20(3):267.

Supek F, Bošnjak M, Škunca N, Šmuc T. REVIGO summarizes and visualizes long lists of gene ontology terms. *PLoS One*. 2011;6(7).

Teotia S, Lamb RS. RCD1 and SRO1 are necessary to maintain meristematic fate in *Arabidopsis thaliana*. *Journal of Experimental Botany*. 2010;62(3):1271-1284.

Terada R, Nakayama T, Iwabuchi M, Shimamoto K. A wheat histone H3 promoter confers cell division-dependent and-independent expression of the *gus A* gene in transgenic rice plants. *The Plant Journal*. 1993;3(2):241-252.

Valouev A, Johnson SM, Boyd SD, Smith CL, Fire AZ, Sidow A. Determinants of nucleosome organization in primary human cells. *Nature*. 2011;474(7352):516.

Wang H, Tang W, Zhu C, Perry SE. A chromatin immunoprecipitation (ChIP) approach to isolate genes regulated by AGL15, a MADS domain protein that preferentially accumulates in embryos. *The Plant Journal*. 2002;32(5):831-843.

Wu J, Ichihashi Y, Suzuki T, Shibata A, Shirasu K, Yamaguchi N, Ito T. Abscisic acid-dependent histone demethylation during postgermination growth arrest in *Arabidopsis*. *Plant, Cell & Environment*. 2019;42(7):2198-2214.

Xiong Y, Contento AL, Bassham DC. AtATG18a is required for the formation of autophagosomes during nutrient stress and senescence in *Arabidopsis thaliana*. *The Plant Journal*. 2005;42(4):535-546.

Xiong Y, Contento AL, Nguyen PQ, Bassham DC. Degradation of oxidized proteins by autophagy during oxidative stress in *Arabidopsis*. *Plant Physiology*. 2007;143(1):291-299.

Zhang H, Van Nocker S. The VERNALIZATION INDEPENDENCE 4 gene encodes a novel regulator of FLOWERING LOCUS C. *The Plant Journal*. 2002;31(5):663-673.

Zhang T, Zhang W, Jiang J. Genome-wide nucleosome occupancy and positioning and their impact on gene expression and evolution in plants. *Plant Physiology*. 2015;168(4):1406-16.
